# Supplementary material for: Tramadol regulates the activation of human platelets via Rac but not Rho/Rho-kinase
Source: PLOS journal article supplement (doi:10.1371/journal.pone.0279011), 2023-01-13
Supplement: S1 (10.1371/journal.pone.0279011.s001) [file journal.pone.0279011.s001]

**Supple. 1. Effects of tramadol, duloxetine, fluvoxamine, sertraline, morphine or reboxetine on the combination of collagen and CXCL12-induced platelet aggregation.**

| agent       | dose<br>( $\mu$ M) | Transmittance<br>(%) | Size of aggregation |                 |                 |
|-------------|--------------------|----------------------|---------------------|-----------------|-----------------|
|             |                    |                      | Large<br>(%)        | Medium<br>(%)   | Small<br>(%)    |
| tramadol    | 0                  | 73.7 $\pm$ 4.3       | 56.3 $\pm$ 4.1      | 17.7 $\pm$ 1.5  | 26.0 $\pm$ 2.9  |
|             | 100                | 53.3 $\pm$ 5.2*      | 32.0 $\pm$ 6.7*     | 24.3 $\pm$ 0.9* | 44.0 $\pm$ 6.1* |
|             | 200                | 34.0 $\pm$ 1.5*      | 12.3 $\pm$ 3.4*     | 20.7 $\pm$ 2.3  | 67.0 $\pm$ 5.7* |
|             | 300                | 26.3 $\pm$ 1.2*      | 6.0 $\pm$ 1.0*      | 15.7 $\pm$ 0.3  | 78.3 $\pm$ 1.2* |
| duloxetine  | 0                  | 74.7 $\pm$ 0.9       | 48.7 $\pm$ 3.8      | 19.0 $\pm$ 0.6  | 32.0 $\pm$ 3.8  |
|             | 10                 | 61.0 $\pm$ 1.5*      | 43.3 $\pm$ 3.2      | 21.7 $\pm$ 0.6  | 37.0 $\pm$ 0.6  |
|             | 20                 | 40.3 $\pm$ 3.8*      | 16.0 $\pm$ 3.8*     | 21.7 $\pm$ 1.9  | 62.3 $\pm$ 5.5* |
|             | 30                 | 20.7 $\pm$ 3.8*      | 7.0 $\pm$ 1.5*      | 11.3 $\pm$ 2.6* | 81.3 $\pm$ 4.3* |
| fluvoxamine | 0                  | 80.3 $\pm$ 3.5       | 58.3 $\pm$ 3.8      | 16.0 $\pm$ 0.6  | 25.7 $\pm$ 3.3  |
|             | 10                 | 75.3 $\pm$ 5.2       | 45.3 $\pm$ 1.8*     | 19.7 $\pm$ 1.2* | 35.0 $\pm$ 1.0* |
|             | 20                 | 56.3 $\pm$ 4.7*      | 25.3 $\pm$ 2.3*     | 24.0 $\pm$ 0.0* | 50.7 $\pm$ 2.0* |
|             | 30                 | 26.3 $\pm$ 6.6*      | 6.7 $\pm$ 3.2*      | 12.0 $\pm$ 2.0  | 81.3 $\pm$ 5.1* |
| sertraline  | 0                  | 81.7 $\pm$ 5.5       | 47.0 $\pm$ 8.4      | 18.7 $\pm$ 1.8  | 34.0 $\pm$ 6.9  |
|             | 10                 | 54.3 $\pm$ 2.3*      | 23.3 $\pm$ 3.4*     | 22.3 $\pm$ 1.8  | 54.7 $\pm$ 4.8  |
|             | 20                 | 45.7 $\pm$ 9.0*      | 18.3 $\pm$ 9.6      | 17.7 $\pm$ 4.1  | 64.0 $\pm$ 13.4 |
|             | 30                 | 26.3 $\pm$ 1.2*      | 6.0 $\pm$ 1.0*      | 15.7 $\pm$ 0.3  | 78.3 $\pm$ 1.2* |
| morphine    | 0                  | 80.0 $\pm$ 2.1       | 52.3 $\pm$ 1.8      | 17.7 $\pm$ 0.3  | 30.3 $\pm$ 1.9  |
|             | 100                | 81.7 $\pm$ 5.5       | 48.7 $\pm$ 2.2      | 19.0 $\pm$ 0.6  | 32.0 $\pm$ 1.5  |
|             | 200                | 83.0 $\pm$ 5.6       | 45.0 $\pm$ 0.6      | 18.7 $\pm$ 1.3  | 35.0 $\pm$ 0.6  |
|             | 300                | 85.3 $\pm$ 5.2       | 51.0 $\pm$ 3.6      | 17.3 $\pm$ 0.3  | 32.3 $\pm$ 3.4  |
| reboxetine  | 0                  | 80.7 $\pm$ 6.8       | 49.3 $\pm$ 3.0      | 18.3 $\pm$ 0.9  | 32.0 $\pm$ 2.5  |
|             | 30                 | 76.7 $\pm$ 6.4       | 48.0 $\pm$ 5.0      | 19.0 $\pm$ 1.0  | 33.3 $\pm$ 3.7  |
|             | 70                 | 77.3 $\pm$ 4.7       | 48.0 $\pm$ 3.6      | 20.7 $\pm$ 0.7  | 31.0 $\pm$ 3.0  |
|             | 100                | 72.0 $\pm$ 6.4       | 48.7 $\pm$ 7.6      | 17.0 $\pm$ 1.5  | 34.7 $\pm$ 6.4  |

PRP was pretreated with various doses of tramadol, duloxetine, fluvoxamine, sertraline, morphine or reboxetine for 3 min, and then simultaneously stimulated by collagen (0.075-0.45  $\mu$ g/ml) and 10 ng/ml of CXCL12 for 5 min. The results analyzed with the aggregometer for the transmittance and the ratio of the platelet aggregates size in large, medium and small, are summarized. Each value represents the mean  $\pm$  SEM of 3 healthy donors. \* $p$ <0.05, compared to the value of control in each.
